# Supplementary material for: Effect of Clindamycin on Intestinal Microbiome and Miltefosine Pharmacology in Hamsters Infected with Leishmania infantum
Source: MDPI journal article supplement (doi:10.3390/antibiotics12020362), 2023-02-09
Supplement: s1 [file s1]

SUPPLEMENTARY MATERIAL 2. Table S1a; Table S1b and Table S1c

**Table S1a:** Phyla abundance (%) in groups G2, G4 and G5 at week 16.

| <b>Phylum</b>              | <b>G2 16w<br/>Abundance</b> | <b>G4 16w<br/>Abundance</b> | <b>G5 16w<br/>Abundance</b> |
|----------------------------|-----------------------------|-----------------------------|-----------------------------|
| <i>Firmicutes</i>          | 61.1140%                    | 58.9661%                    | 60.5420%                    |
| <i>Bacteroidetes</i>       | 34.3401%                    | 36.1905%                    | 35.6117%                    |
| <i>Proteobacteria</i>      | 1.3200%                     | 1.1671%                     | 1.3143%                     |
| <i>Verrucomicrobia</i>     | 1.0651%                     | 1.1755%                     | 0.3401%                     |
| <i>Patescibacteria</i>     | 0.6014%                     | 0.5012%                     | 0.4671%                     |
| <i>Cyanobacteria</i>       | 0.5318%                     | 0.8072%                     | 0.8060%                     |
| <i>Epsilonbacteraeota</i>  | 0.4986%                     | 0.4881%                     | 0.4610%                     |
| <i>Deferribacteres</i>     | 0.2077%                     | 0.1443%                     | 0.1117%                     |
| <i>Tenericutes</i>         | 0.1619%                     | 0.3702%                     | 0.1901%                     |
| <i>Actinobacteria</i>      | 0.1237%                     | 0.1276%                     | 0.0840%                     |
| <i>Elusimicrobia</i>       | 0.0294%                     | 0.0507%                     | 0.0685%                     |
| <i>Chloroflexi</i>         | 0.0023%                     | 0.0021%                     | 0.0005%                     |
| <i>Planctomycetes</i>      | 0.0015%                     | 0.0030%                     | 0.0010%                     |
| <i>Lentisphaerae</i>       | 0.0008%                     | 0.0019%                     | 0.0012%                     |
| <i>Deinococcus-Thermus</i> | 0.0008%                     | 0.0008%                     | 0.0002%                     |
| <i>Fusobacteria</i>        | 0.0005%                     | 0.0017%                     | 0.0005%                     |
| <i>Spirochaetes</i>        | 0.0003%                     | 0.0004%                     | 0.0000%                     |
| WPS-2                      | 0.0003%                     | 0.0004%                     | 0.0000%                     |
| <i>Synergistetes</i>       | 0.0000%                     | 0.0006%                     | 0.0002%                     |
| <i>Euryarchaeota</i>       | 0.0000%                     | 0.0002%                     | 0.0000%                     |
| <i>Gemmatimonadetes</i>    | 0.0000%                     | 0.0004%                     | 0.0000%                     |

**Table S1b.** Abundance (%) of the 25 most represented families in groups G2, G4 and G5 at week 16.

| <b>Family</b>              | <b>G2 16w<br/>Abundance</b> | <b>G4 16w<br/>Abundance</b> | <b>G5 16w<br/>Abundance</b> |
|----------------------------|-----------------------------|-----------------------------|-----------------------------|
| <i>Ruminococcaceae</i>     | 32.2645%                    | 32.2150%                    | 31.4767%                    |
| <i>Muribaculaceae</i>      | 26.1638%                    | 25.0165%                    | 28.0887%                    |
| <i>Lachnospiraceae</i>     | 26.7086%                    | 25.1470%                    | 27.3458%                    |
| <i>Prevotellaceae</i>      | 5.5302%                     | 6.1110%                     | 4.2255%                     |
| <i>Rikenellaceae</i>       | 1.1679%                     | 1.5924%                     | 1.1451%                     |
| <i>Marinifilaceae</i>      | 0.7895%                     | 2.2631%                     | 0.8465%                     |
| <i>Desulfovibrionaceae</i> | 1.1578%                     | 0.9331%                     | 1.2065%                     |
| <i>Lactobacillaceae</i>    | 1.4827%                     | 0.4334%                     | 0.7164%                     |
| <i>Akkermansiaceae</i>     | 1.0615%                     | 1.1690%                     | 0.3382%                     |
| uncultured bacterium-04    | 0.5132%                     | 0.7858%                     | 0.7921%                     |
| <i>Peptococcaceae</i>      | 0.1431%                     | 0.1327%                     | 0.2316%                     |
| <i>Deferribacteraceae</i>  | 0.2077%                     | 0.1443%                     | 0.1117%                     |
| <i>Erysipelotrichaceae</i> | 0.1483%                     | 0.1846%                     | 0.0607%                     |
| uncultured-04              | 0.0845%                     | 0.1204%                     | 0.0651%                     |
| Family XIII                | 0.0847%                     | 0.0956%                     | 0.0784%                     |
| <i>Christensenellaceae</i> | 0.0347%                     | 0.0790%                     | 0.0573%                     |
| <i>Bifidobacteriaceae</i>  | 0.0757%                     | 0.0394%                     | 0.0393%                     |
| <i>Elusimicrobiaceae</i>   | 0.0294%                     | 0.0507%                     | 0.0685%                     |
| <i>Eggerthellaceae</i>     | 0.0274%                     | 0.0530%                     | 0.0369%                     |

**Table S1c.** Abundance (%) of the 25 most represented genera in groups G2, G4 and G5 at week 16.

| <b>Genus</b>                                     | <b>G2 16w<br/>Abundance</b> | <b>G4 16w<br/>Abundance</b> | <b>G5 16w<br/>Abundance</b> |
|--------------------------------------------------|-----------------------------|-----------------------------|-----------------------------|
| uncultured bacterium-07                          | 24.3150%                    | 23.3357%                    | 26.5622%                    |
| <i>Lachnospiraceae</i> NK4A136 group             | 11.9858%                    | 8.3200%                     | 9.2022%                     |
| uncultured-15                                    | 8.0207%                     | 6.6331%                     | 8.5004%                     |
| <i>Ruminococcaceae</i> UCG-014                   | 6.1045%                     | 9.8599%                     | 6.2366%                     |
| uncultured-13                                    | 6.0374%                     | 7.3492%                     | 5.7860%                     |
| <i>Ruminiclostridium</i> 6                       | 4.4788%                     | 2.7187%                     | 3.9563%                     |
| <i>Alloprevotella</i>                            | 3.3918%                     | 3.7775%                     | 2.4781%                     |
| <i>Ruminococcus</i> 1                            | 3.6513%                     | 2.9065%                     | 2.6891%                     |
| [ <i>Eubacterium</i> ] <i>ruminantium</i> group  | 1.0158%                     | 3.2178%                     | 4.5707%                     |
| [ <i>Eubacterium</i> ] <i>xylanophilum</i> group | 2.3961%                     | 2.4045%                     | 2.3492%                     |
| <i>Ruminiclostridium</i>                         | 2.2294%                     | 2.3297%                     | 2.2727%                     |
| <i>Prevotellaceae</i> UCG-001                    | 2.0700%                     | 2.2529%                     | 1.6777%                     |
| <i>Oscillibacter</i>                             | 1.3509%                     | 2.0529%                     | 2.1977%                     |
| <i>Ruminiclostridium</i> 9                       | 1.6275%                     | 1.8435%                     | 1.4864%                     |
| <i>Coproccoccus</i> 2                            | 1.5672%                     | 1.2512%                     | 0.9674%                     |
| <i>Alistipes</i>                                 | 1.0967%                     | 1.5048%                     | 1.0648%                     |
| <i>Muribaculum</i>                               | 1.3713%                     | 1.1374%                     | 1.0453%                     |
| <i>Odoribacter</i>                               | 0.4991%                     | 2.0493%                     | 0.6028%                     |
| uncultured-26                                    | 1.0339%                     | 0.8443%                     | 1.1085%                     |
| <i>Lactobacillus</i>                             | 1.4827%                     | 0.4334%                     | 0.7164%                     |
| <i>Akkermansia</i>                               | 1.0615%                     | 1.1690%                     | 0.3382%                     |
| <i>Ruminococcaceae</i> UCG-003                   | 0.7525%                     | 0.8479%                     | 0.9565%                     |
| <i>Anaerosporebacter</i>                         | 0.1742%                     | 0.6402%                     | 1.7251%                     |
| uncultured bacterium-19                          | 0.5132%                     | 0.7858%                     | 0.7921%                     |
| CAG-352                                          | 1.5365%                     | 0.3707%                     | 0.0097%                     |
