# Supplementary material for: Effect of Clindamycin on Intestinal Microbiome and Miltefosine Pharmacology in Hamsters Infected with Leishmania infantum
Source: MDPI journal article supplement (doi:10.3390/antibiotics12020362), 2023-02-09
Supplement: s1 [file s1]

SUPPLEMENTARY MATERIAL 3. Table S2a; Table S2b and Table S2c

**Table S2a:** Phyla abundance (%) in groups G2 and G4 at weeks 16 and 18.

| <b>Phylum</b>              | <b>G2 16w<br/>Abundance</b> | <b>G2 18w<br/>Abundance</b> | <b>G4 16w<br/>Abundance</b> | <b>G4 18w<br/>Abundance</b> |
|----------------------------|-----------------------------|-----------------------------|-----------------------------|-----------------------------|
| <i>Firmicutes</i>          | 61.1140%                    | 58.2260%                    | 58.9661%                    | 58.7055%                    |
| <i>Bacteroidetes</i>       | 34.3401%                    | 36.0484%                    | 36.1905%                    | 35.7798%                    |
| <i>Proteobacteria</i>      | 1.3200%                     | 1.7405%                     | 1.1671%                     | 1.9341%                     |
| <i>Patescibacteria</i>     | 0.6014%                     | 1.7307%                     | 0.5012%                     | 0.8224%                     |
| <i>Verrucomicrobia</i>     | 1.0651%                     | 0.4145%                     | 1.1755%                     | 0.5480%                     |
| <i>Cyanobacteria</i>       | 0.5318%                     | 0.2992%                     | 0.8072%                     | 0.8523%                     |
| <i>Epsilonbacteraeota</i>  | 0.4986%                     | 0.8571%                     | 0.4881%                     | 0.6056%                     |
| <i>Tenericutes</i>         | 0.1619%                     | 0.2333%                     | 0.3702%                     | 0.3195%                     |
| <i>Deferribacteres</i>     | 0.2077%                     | 0.2569%                     | 0.1443%                     | 0.2222%                     |
| <i>Actinobacteria</i>      | 0.1237%                     | 0.1745%                     | 0.1276%                     | 0.1484%                     |
| <i>Elusimicrobia</i>       | 0.0294%                     | 0.0127%                     | 0.0507%                     | 0.0497%                     |
| <i>Chloroflexi</i>         | 0.0023%                     | 0.0011%                     | 0.0021%                     | 0.0033%                     |
| <i>Planctomycetes</i>      | 0.0015%                     | 0.0000%                     | 0.0030%                     | 0.0031%                     |
| <i>Fusobacteria</i>        | 0.0005%                     | 0.0022%                     | 0.0017%                     | 0.0031%                     |
| <i>Lentisphaerae</i>       | 0.0008%                     | 0.0022%                     | 0.0019%                     | 0.0015%                     |
| <i>Deinococcus-Thermus</i> | 0.0008%                     | 0.0000%                     | 0.0008%                     | 0.0004%                     |
| <i>Spirochaetes</i>        | 0.0003%                     | 0.0000%                     | 0.0004%                     | 0.0004%                     |
| <i>Synergistetes</i>       | 0.0000%                     | 0.0004%                     | 0.0006%                     | 0.0000%                     |
| WPS-2                      | 0.0003%                     | 0.0000%                     | 0.0004%                     | 0.0002%                     |
| <i>Euryarchaeota</i>       | 0.0000%                     | 0.0002%                     | 0.0002%                     | 0.0004%                     |
| <i>Gemmatimonadetes</i>    | 0.0000%                     | 0.0000%                     | 0.0004%                     | 0.0002%                     |

**Table S2b.** Differential Abundance (%) Analysis of the 25 most abundant families detected in groups G2 and G4 at weeks 16 and 18.

| Family                                  | G2 16w<br>Abundance | G2 18w<br>Abundance | G2 18w vs G2<br>16w - Presence<br>Fold Change | G2 18w vs G2<br>16w - FDR<br>p-value | G4 16w<br>Abundance | G4 18w<br>Abundance | G4 18w vs G4<br>16w Log2<br>Presence Fold<br>Change | G4 18w vs G4<br>16w FDR<br>p-value |
|-----------------------------------------|---------------------|---------------------|-----------------------------------------------|--------------------------------------|---------------------|---------------------|-----------------------------------------------------|------------------------------------|
| <i>Ruminococcaceae</i>                  | 32.2645%            | 32.5057%            | 1.52                                          | 0.9216                               | 32.2150%            | 29.1282%            | -1.08                                               | 0.9627                             |
| <i>Muribaculaceae</i>                   | 26.1638%            | 27.7406%            | 1.17                                          | 0.9216                               | 25.0165%            | 26.7692%            | 1.06                                                | 0.9627                             |
| <i>Lachnospiraceae</i>                  | 26.7086%            | 23.1744%            | 1.68                                          | 0.9216                               | 25.1470%            | 27.7307%            | 1.17                                                | 0.9627                             |
| <i>Prevotellaceae</i>                   | 5.5302%             | 4.2778%             | -1.27                                         | 0.9216                               | 6.1110%             | 5.7026%             | -1.19                                               | 0.9627                             |
| <i>Desulfovibrionaceae</i>              | 1.1578%             | 1.5727%             | 2.76                                          | 0.9216                               | 0.9331%             | 1.6329%             | 2.08                                                | 0.9627                             |
| <i>Rikenellaceae</i>                    | 1.1679%             | 0.6915%             | -1.44                                         | 0.9216                               | 1.5924%             | 1.0926%             | -2.06                                               | 0.9627                             |
| <i>Lactobacillaceae</i>                 | 1.4827%             | 1.5694%             | 1.33                                          | 0.9216                               | 0.4334%             | 0.6920%             | 2.14                                                | 0.9627                             |
| <i>Marinifilaceae</i>                   | 0.7895%             | 0.3671%             | -1.58                                         | 0.9216                               | 2.2631%             | 0.7257%             | -4.66                                               | 0.9627                             |
| <i>Saccharimonadaceae</i>               | 0.6012%             | 1.7296%             | 3.11                                          | 0.8298                               | 0.5001%             | 0.8213%             | 1.60                                                | 0.9627                             |
| <i>Bacteroidaceae</i>                   | 0.2990%             | 2.3036%             | 9.70                                          | 0.0004                               | 0.4919%             | 0.5571%             | 1.12                                                | 0.9627                             |
| <i>Akkermansiaceae</i>                  | 1.0615%             | 0.4136%             | -2.40                                         | 0.9216                               | 1.1690%             | 0.5407%             | -2.82                                               | 0.9627                             |
| <i>Tannerellaceae</i>                   | 0.3714%             | 0.6444%             | 2.50                                          | 0.9216                               | 0.6631%             | 0.8877%             | 1.07                                                | 0.9627                             |
| <i>Helicobacteraceae</i>                | 0.4983%             | 0.8571%             | 1.90                                          | 0.9216                               | 0.4878%             | 0.6054%             | 1.41                                                | 0.9627                             |
| uncultured<br>bacterium-04              | 0.5132%             | 0.2940%             | -1.08                                         | 0.9216                               | 0.7858%             | 0.8166%             | -1.31                                               | 0.9627                             |
| <i>Clostridiales</i><br>vadinBB60 group | 0.1735%             | 0.4366%             | 4.04                                          | 0.8298                               | 0.6220%             | 0.5906%             | -1.12                                               | 0.9627                             |
| <i>Deferribacteraceae</i>               | 0.2077%             | 0.2569%             | 1.65                                          | 0.9216                               | 0.1443%             | 0.2222%             | -1.06                                               | 0.9627                             |
| uncultured<br>bacterium-15              | 0.1142%             | 0.1897%             | 1.78                                          | 0.9216                               | 0.2677%             | 0.2472%             | 1.04                                                | 0.9627                             |
| <i>Peptococcaceae</i>                   | 0.1431%             | 0.1948%             | 3.33                                          | 0.9216                               | 0.1327%             | 0.2231%             | 1.96                                                | 0.9627                             |
| <i>Erysipelotrichaceae</i>              | 0.1483%             | 0.1499%             | 1.17                                          | 0.9216                               | 0.1846%             | 0.1368%             | -1.33                                               | 0.9627                             |
| uncultured-04                           | 0.0845%             | 0.1010%             | 1.37                                          | 0.9216                               | 0.1204%             | 0.1811%             | 1.30                                                | 0.9627                             |
| Family XIII                             | 0.0847%             | 0.1146%             | 2.01                                          | 0.9216                               | 0.0956%             | 0.0863%             | -1.16                                               | 0.9627                             |
| <i>Bifidobacteriaceae</i>               | 0.0757%             | 0.0773%             | 1.15                                          | 0.9216                               | 0.0394%             | 0.0678%             | 1.59                                                | 0.9627                             |
| <i>Christensenellaceae</i>              | 0.0347%             | 0.0556%             | 1.70                                          | 0.9216                               | 0.0790%             | 0.0840%             | -1.32                                               | 0.9627                             |
| <i>Eggerthellaceae</i>                  | 0.0274%             | 0.0454%             | 1.98                                          | 0.9216                               | 0.0530%             | 0.0403%             | -1.20                                               | 0.9627                             |
| <i>Burkholderiaceae</i>                 | 0.0362%             | 0.0337%             | 1.07                                          | 0.9216                               | 0.0464%             | 0.0368%             | -1.20                                               | 0.9627                             |

**Table S2c.** Differential Abundance (%) Analysis of the 40 most abundant genera detected in groups G2 and G4 at weeks 16 and 18.

| Genus                                                       | G2 16w<br>Abundance | G2 18w<br>Abundance | G2 18w vs G2<br>16w - Presence<br>Fold Change | G2 18w vs G2<br>16w - FDR<br>p-value | G4 16w<br>Abundance | G4 18w<br>Abundance | G4 18w vs G4<br>16w Log2<br>Presence Fold<br>Change | G4 18w vs G4<br>16w FDR<br>p-value |
|-------------------------------------------------------------|---------------------|---------------------|-----------------------------------------------|--------------------------------------|---------------------|---------------------|-----------------------------------------------------|------------------------------------|
| uncultured<br>bacterium-07                                  | 24.3150%            | 26.3560%            | 1.16                                          | 0.9911                               | 23.3357%            | 25.7377%            | -1.13                                               | 0.9978                             |
| <i>Lachnospiraceae</i><br>NK4A136 group                     | 11.9858%            | 8.9817%             | -1.10                                         | 0.9911                               | 8.3200%             | 9.6953%             | 1.35                                                | 0.9978                             |
| uncultured-15                                               | 8.0207%             | 7.1265%             | -1.10                                         | 0.9911                               | 6.6331%             | 6.6948%             | 1.07                                                | 0.9978                             |
| uncultured-13                                               | 6.0374%             | 5.8431%             | 1.00                                          | 0.9978                               | 7.3492%             | 7.6529%             | -1.02                                               | 0.9978                             |
| <i>Ruminococcaceae</i><br>UCG-014                           | 6.1045%             | 5.1639%             | -1.10                                         | 0.9911                               | 9.8599%             | 5.4716%             | -2.29                                               | 0.9978                             |
| <i>Alloprevotella</i>                                       | 3.3918%             | 3.1316%             | -1.04                                         | 0.9911                               | 3.7775%             | 4.1431%             | 1.01                                                | 0.9978                             |
| <i>Ruminiclostridium</i> 6                                  | 4.4788%             | 4.1084%             | -1.07                                         | 0.9911                               | 2.7187%             | 2.8602%             | -1.01                                               | 0.9978                             |
| <i>Ruminococcus</i> 1                                       | 3.6513%             | 2.1420%             | -1.81                                         | 0.9911                               | 2.9065%             | 2.7827%             | -1.23                                               | 0.9978                             |
| [ <i>Eubacterium</i> ]<br><i>ruminantium</i> group          | 1.0158%             | 1.8272%             | 1.94                                          | 0.9911                               | 3.2178%             | 4.1690%             | 1.45                                                | 0.9978                             |
| <i>Ruminiclostridium</i>                                    | 2.2294%             | 2.2917%             | 1.12                                          | 0.9911                               | 2.3297%             | 3.1851%             | 1.46                                                | 0.9978                             |
| [ <i>Eubacterium</i> ]<br><i>xylanophilum</i> group         | 2.3961%             | 2.1847%             | 1.02                                          | 0.9911                               | 2.4045%             | 1.6668%             | 1.01                                                | 0.9978                             |
| <i>Oscillibacter</i>                                        | 1.3509%             | 2.2993%             | 1.95                                          | 0.9911                               | 2.0529%             | 1.9485%             | 1.10                                                | 0.9978                             |
| <i>Ruminiclostridium</i> 9                                  | 1.6275%             | 1.8203%             | 1.27                                          | 0.9911                               | 1.8435%             | 2.1052%             | 1.22                                                | 0.9978                             |
| <i>Prevotellaceae</i> UCG-<br>001                           | 2.0700%             | 1.0928%             | -1.78                                         | 0.9911                               | 2.2529%             | 1.4857%             | -2.35                                               | 0.9978                             |
| uncultured-26                                               | 1.0339%             | 1.4020%             | 1.61                                          | 0.9911                               | 0.8443%             | 1.5362%             | 2.19                                                | 0.9978                             |
| <i>Coprococcus</i> 2                                        | 1.5672%             | 0.9657%             | -1.61                                         | 0.9911                               | 1.2512%             | 0.7669%             | -2.29                                               | 0.9978                             |
| <i>Alistipes</i>                                            | 1.0967%             | 0.6390%             | -1.68                                         | 0.9911                               | 1.5048%             | 1.0394%             | -1.68                                               | 0.9978                             |
| <i>Lactobacillus</i>                                        | 1.4827%             | 1.5694%             | 1.15                                          | 0.9911                               | 0.4334%             | 0.6920%             | 1.18                                                | 0.9978                             |
| <i>Muribaculum</i>                                          | 1.3713%             | 1.0157%             | -1.41                                         | 0.9911                               | 1.1374%             | 0.4999%             | -2.71                                               | 0.9978                             |
| <i>Ruminococcaceae</i><br>UCG-003                           | 0.7525%             | 1.0932%             | 1.57                                          | 0.9911                               | 0.8479%             | 1.0604%             | 1.25                                                | 0.9978                             |
| <i>Candidatus</i><br><i>Saccharimonas</i>                   | 0.6012%             | 1.7296%             | 3.82                                          | 0.7840                               | 0.5001%             | 0.8213%             | 1.30                                                | 0.9978                             |
| <i>Bacteroides</i>                                          | 0.2990%             | 2.3036%             | 7.44                                          | 0.0521                               | 0.4919%             | 0.5571%             | -1.11                                               | 0.9978                             |
| CAG-352                                                     | 1.5365%             | 1.3712%             | -1.03                                         | 0.9911                               | 0.3707%             | 0.0222%             | -31.09                                              | 0.5330                             |
| <i>Odoribacter</i>                                          | 0.4991%             | 0.1325%             | -3.95                                         | 0.9911                               | 2.0493%             | 0.5303%             | -4.11                                               | 0.9978                             |
| <i>Akkermansia</i>                                          | 1.0615%             | 0.4136%             | -2.08                                         | 0.9911                               | 1.1690%             | 0.5407%             | -2.87                                               | 0.9978                             |
| <i>Parabacteroides</i>                                      | 0.3714%             | 0.6435%             | 1.70                                          | 0.9911                               | 0.6631%             | 0.8872%             | 1.00                                                | 0.9978                             |
| <i>Helicobacter</i>                                         | 0.4983%             | 0.8571%             | 2.20                                          | 0.9911                               | 0.4878%             | 0.6054%             | -1.06                                               | 0.9978                             |
| uncultured<br>bacterium-19                                  | 0.5132%             | 0.2940%             | -1.69                                         | 0.9911                               | 0.7858%             | 0.8166%             | -1.19                                               | 0.9978                             |
| <i>Ruminiclostridium</i> 5                                  | 0.6283%             | 0.6372%             | 1.11                                          | 0.9911                               | 0.4984%             | 0.5390%             | 1.14                                                | 0.9978                             |
| [ <i>Eubacterium</i> ]<br><i>coprostanoligenes</i><br>group | 0.4423%             | 0.9585%             | 2.57                                          | 0.9911                               | 0.5520%             | 0.3189%             | -2.15                                               | 0.9978                             |
| <i>Ruminococcaceae</i><br>UCG-010                           | 0.3404%             | 0.6459%             | 2.15                                          | 0.9911                               | 0.4773%             | 0.5771%             | -1.16                                               | 0.9978                             |
| <i>Anaerosporeobacter</i>                                   | 0.1742%             | 0.4203%             | 1.97                                          | 0.9911                               | 0.6402%             | 0.7673%             | 1.41                                                | 0.9978                             |
| uncultured<br><i>Bacteroidales</i><br>bacterium             | 0.4692%             | 0.3546%             | -1.33                                         | 0.9911                               | 0.5160%             | 0.4973%             | -1.23                                               | 0.9978                             |

|                                         |         |         |        |        |         |         |       |        |
|-----------------------------------------|---------|---------|--------|--------|---------|---------|-------|--------|
| uncultured<br>bacterium-21              | 0.1700% | 0.4102% | 2.47   | 0.9911 | 0.5732% | 0.5617% | 1.09  | 0.9978 |
| <i>Ruminococcus</i> 2                   | 0.0055% | 1.5057% | 255.33 | 0.0004 | 0.0068% | 0.1351% | 15.31 | 0.9978 |
| <i>Roseburia</i>                        | 0.6153% | 0.2701% | -1.57  | 0.9911 | 0.2162% | 0.5114% | 3.45  | 0.9978 |
| <i>Lachnospiraceae</i><br>UCG-006       | 0.4091% | 0.3812% | 1.20   | 0.9911 | 0.3122% | 0.3179% | 1.17  | 0.9978 |
| <i>Ruminococcaceae</i><br>NK4A214 group | 0.2132% | 0.2393% | 1.12   | 0.9911 | 0.3393% | 0.3944% | 1.31  | 0.9978 |
| GCA-900066575                           | 0.2532% | 0.2733% | 1.08   | 0.9911 | 0.3283% | 0.3314% | -1.06 | 0.9978 |
| <i>Ruminococcaceae</i><br>UCG-013       | 0.1597% | 0.4761% | 3.03   | 0.9911 | 0.2337% | 0.2669% | 1.36  | 0.9978 |
