# Supplementary material for: Effect of Clindamycin on Intestinal Microbiome and Miltefosine Pharmacology in Hamsters Infected with Leishmania infantum
Source: MDPI journal article supplement (doi:10.3390/antibiotics12020362), 2023-02-09
Supplement: s1 [file s1]

SUPPLEMENTARY INFORMATION 4. Table S3a; Table S3b and Table S3c

**Table S3a:** Differential Abundance (%) Analysis of the phyla detected in groups G4 and G5 at week 18 and PF.

| Phylum                     | G4 18w<br>Abundance | G5 18w<br>Abundance | G5 18w vs G4<br>18w -<br>Abundance<br>Fold Change | G5 18w vs G4<br>18w - FDR<br>p-value | G4 PF<br>Abundance | G5 PF<br>Abundance | G5 PF vs G4 PF<br>Abundance<br>change | G5 PFvs G4 PF<br>Fold PF-FDR p-value |
|----------------------------|---------------------|---------------------|---------------------------------------------------|--------------------------------------|--------------------|--------------------|---------------------------------------|--------------------------------------|
| <i>Firmicutes</i>          | 58.7055%            | 44.2926%            | -1.26                                             | 0.6159                               | 54.8841%           | 50.7090%           | -1.11                                 | 0.9297                               |
| <i>Bacteroidetes</i>       | 35.7798%            | 47.3925%            | 1.41                                              | 0.1666                               | 39.8885%           | 43.2804%           | 1.03                                  | 0.9593                               |
| <i>Proteobacteria</i>      | 1.9341%             | 3.1373%             | 1.93                                              | 0.3520                               | 1.3500%            | 2.1649%            | 1.71                                  | 0.5945                               |
| <i>Cyanobacteria</i>       | 0.8523%             | 0.3840%             | -2.29                                             | 0.0598                               | 0.5490%            | 0.6104%            | 1.01                                  | 0.9881                               |
| <i>Patescibacteria</i>     | 0.8224%             | 0.5218%             | -1.45                                             | 0.6159                               | 0.5922%            | 0.6891%            | 1.06                                  | 0.9593                               |
| <i>Epsilonbacteraeota</i>  | 0.6056%             | 0.8948%             | 1.49                                              | 0.6159                               | 0.6024%            | 0.6267%            | -1.13                                 | 0.9481                               |
| <i>Verrucomicrobia</i>     | 0.5480%             | 2.5723%             | 7.15                                              | 0.0432                               | 1.3128%            | 0.9728%            | -1.80                                 | 0.7925                               |
| <i>Tenericutes</i>         | 0.3195%             | 0.4443%             | 1.30                                              | 0.7671                               | 0.3204%            | 0.1797%            | -2.10                                 | 0.4961                               |
| <i>Deferribacteres</i>     | 0.2222%             | 0.0240%             | -7.53                                             | 0.0072                               | 0.2322%            | 0.1784%            | -1.17                                 | 0.9481                               |
| <i>Actinobacteria</i>      | 0.1484%             | 0.1286%             | -1.07                                             | 0.9848                               | 0.1934%            | 0.2472%            | 1.20                                  | 0.9297                               |
| <i>Elusimicrobia</i>       | 0.0497%             | 0.0199%             | -2.51                                             | 0.6159                               | 0.0494%            | 0.3207%            | 4.51                                  | 0.4961                               |
| <i>Chloroflexi</i>         | 0.0033%             | 0.0000%             | -26.28                                            | 0.1527                               | 0.0071%            | 0.0026%            | -2.51                                 | 0.5945                               |
| <i>Fusobacteria</i>        | 0.0031%             | 0.1846%             | 60.55                                             | 0.0000                               | 0.0031%            | 0.0023%            | -1.36                                 | 0.9297                               |
| <i>Planctomycetes</i>      | 0.0031%             | 0.0000%             | -25.34                                            | 0.1527                               | 0.0067%            | 0.0031%            | -1.79                                 | 0.7925                               |
| <i>Lentisphaerae</i>       | 0.0015%             | 0.0019%             | 1.26                                              | 0.9612                               | 0.0013%            | 0.0044%            | 3.29                                  | 0.4961                               |
| <i>Euryarchaeota</i>       | 0.0004%             | 0.0014%             | 3.18                                              | 0.3520                               | 0.0000%            | 0.0047%            | 37.41                                 | 0.1201                               |
| <i>Spirochaetes</i>        | 0.0004%             | 0.0000%             | -4.01                                             | 0.6159                               | 0.0019%            | 0.0010%            | -1.66                                 | 0.8271                               |
| <i>Deinococcus-Thermus</i> | 0.0004%             | 0.0000%             | -3.97                                             | 0.6159                               | 0.0023%            | 0.0013%            | -1.76                                 | 0.7925                               |
| WPS-2                      | 0.0002%             | 0.0000%             | -2.47                                             | 0.7671                               | 0.0006%            | 0.0003%            | -1.88                                 | 0.8271                               |
| <i>Gemmatimonadetes</i>    | 0.0002%             | 0.0000%             | -2.47                                             | 0.7671                               | 0.0017%            | 0.0000%            | -15.38                                | 0.4961                               |
| BRC1                       | 0.0000%             | 0.0000%             | 0.05                                              | 0.9848                               | 0.0000%            | 0.0005%            | 5.04                                  | 0.5945                               |
| <i>Chrysiogenetes</i>      | 0.0000%             | 0.0000%             | 0.05                                              | 0.9848                               | 0.0000%            | 0.0005%            | 5.04                                  | 0.5945                               |
| <i>Synergistetes</i>       | 0.0000%             | 0.0000%             | 0.05                                              | 0.9848                               | 0.0008%            | 0.0000%            | -7.42                                 | 0.5945                               |

**Table S3b.** Differential Abundance (%) Analysis of the families with an abundance >0.01% detected in groups G4 and G5 at week 18 and PF.

| Family                                  | G4 18w<br>Abundance | G5 18w<br>Abundance | G5 18w vs G4<br>18w -<br>Abundance<br>Fold Change | G5 18w vs G4<br>18w - FDR<br>p-value | G4 PF<br>Abundance | G5 PF<br>Abundance | 35 PF vs G4 PF<br>Abundance<br>Fold change | 35 PFvs G4 PF<br>F-FDR p-value |
|-----------------------------------------|---------------------|---------------------|---------------------------------------------------|--------------------------------------|--------------------|--------------------|--------------------------------------------|--------------------------------|
| <i>Ruminococcaceae</i>                  | 29.1282%            | 19.3249%            | -1.84                                             | 0.4847                               | 29.1878%           | 25.9780%           | -1.29                                      | 0.8575                         |
| <i>Lachnospiraceae</i>                  | 27.7307%            | 23.9904%            | -1.62                                             | 0.8771                               | 23.1925%           | 21.7134%           | -1.16                                      | 0.9618                         |
| <i>Muribaculaceae</i>                   | 26.7692%            | 23.9232%            | 1.00                                              | 0.9920                               | 31.4890%           | 31.7463%           | -1.25                                      | 0.8455                         |
| <i>Prevotellaceae</i>                   | 5.7026%             | 5.0367%             | 1.16                                              | 0.8771                               | 5.5797%            | 3.1548%            | -1.92                                      | 0.8288                         |
| <i>Desulfovibrionaceae</i>              | 1.6329%             | 0.6540%             | -3.53                                             | 0.2844                               | 1.1082%            | 1.6712%            | 1.70                                       | 0.8455                         |
| <i>Rikenellaceae</i>                    | 1.0926%             | 0.9589%             | 1.13                                              | 0.8771                               | 0.9067%            | 0.9596%            | -1.05                                      | 0.9618                         |
| <i>Tannerellaceae</i>                   | 0.8877%             | 6.5018%             | 10.10                                             | 0.0000                               | 0.8427%            | 2.6404%            | 2.15                                       | 0.8288                         |
| <i>Saccharimonadaceae</i>               | 0.8213%             | 0.5216%             | -1.41                                             | 0.8771                               | 0.5880%            | 0.6881%            | 1.31                                       | 0.8827                         |
| uncultured<br>bacterium-04              | 0.8166%             | 0.3790%             | -1.60                                             | 0.7239                               | 0.4904%            | 0.5405%            | -1.42                                      | 0.8379                         |
| <i>Marinifilaceae</i>                   | 0.7257%             | 0.2026%             | -2.41                                             | 0.5372                               | 0.6233%            | 0.3016%            | -2.78                                      | 0.8288                         |
| <i>Lactobacillaceae</i>                 | 0.6920%             | 0.2268%             | -2.78                                             | 0.5611                               | 1.7371%            | 1.9552%            | -1.26                                      | 0.9618                         |
| <i>Helicobacteraceae</i>                | 0.6054%             | 0.8948%             | 1.59                                              | 0.8771                               | 0.6018%            | 0.6252%            | -1.04                                      | 0.9815                         |
| <i>Clostridiales</i><br>vadinBB60 group | 0.5906%             | 0.0970%             | -5.47                                             | 0.0253                               | 0.2388%            | 0.4543%            | 1.25                                       | 0.9618                         |
| <i>Bacteroidaceae</i>                   | 0.5571%             | 10.7110%            | 24.10                                             | 0.0000                               | 0.3675%            | 4.4214%            | 8.01                                       | 0.0002                         |
| <i>Akkermansiaceae</i>                  | 0.5407%             | 2.5720%             | 8.16                                              | 0.0354                               | 1.2987%            | 0.9640%            | -1.95                                      | 0.8295                         |
| uncultured<br>bacterium-15              | 0.2472%             | 0.3394%             | 1.73                                              | 0.7831                               | 0.2370%            | 0.1300%            | -2.35                                      | 0.8288                         |
| <i>Peptococcaceae</i>                   | 0.2231%             | 0.0749%             | -3.80                                             | 0.2193                               | 0.1243%            | 0.1315%            | -1.01                                      | 0.9947                         |
| <i>Deferribacteraceae</i>               | 0.2222%             | 0.0240%             | -6.61                                             | 0.0315                               | 0.2322%            | 0.1784%            | -1.71                                      | 0.8455                         |
| uncultured-04                           | 0.1811%             | 1.6086%             | 14.07                                             | 0.0000                               | 0.0471%            | 0.3194%            | 4.72                                       | 0.2816                         |
| <i>Erysipelotrichaceae</i>              | 0.1368%             | 0.1971%             | 2.16                                              | 0.5307                               | 0.1746%            | 0.1890%            | -1.22                                      | 0.9618                         |
| Family XIII                             | 0.0863%             | 0.1368%             | 1.22                                              | 0.8771                               | 0.0838%            | 0.1406%            | 1.42                                       | 0.8575                         |
| <i>Christensenellaceae</i>              | 0.0840%             | 0.1455%             | 2.93                                              | 0.0934                               | 0.0649%            | 0.0924%            | -1.00                                      | 0.9947                         |
| <i>Bifidobacteriaceae</i>               | 0.0678%             | 0.0430%             | -1.17                                             | 0.8771                               | 0.1110%            | 0.1007%            | -1.71                                      | 0.8295                         |
| <i>Elusimicrobiaceae</i>                | 0.0497%             | 0.0199%             | -1.12                                             | 0.9036                               | 0.0490%            | 0.3207%            | 4.26                                       | 0.8288                         |
| <i>Eggerthellaceae</i>                  | 0.0403%             | 0.0362%             | 1.09                                              | 0.8771                               | 0.0486%            | 0.1100%            | 2.04                                       | 0.8288                         |
| <i>Burkholderiaceae</i>                 | 0.0368%             | 0.3552%             | 12.78                                             | 0.0000                               | 0.0505%            | 0.0456%            | -1.32                                      | 0.8827                         |
| unidentified                            | 0.0355%             | 0.0014%             | -16.64                                            | 0.0005                               | 0.0204%            | 0.0303%            | 1.26                                       | 0.9618                         |
| <i>Flavobacteriaceae</i>                | 0.0283%             | 0.0581%             | 2.25                                              | 0.6572                               | 0.0486%            | 0.0337%            | -1.69                                      | 0.8455                         |
| <i>Enterobacteriaceae</i>               | 0.0254%             | 0.5180%             | 37.14                                             | 0.0013                               | 0.0102%            | 0.0484%            | 3.54                                       | 0.8295                         |
| <i>Atopobiaceae</i>                     | 0.0249%             | 0.0444%             | 2.65                                              | 0.5611                               | 0.0096%            | 0.0189%            | 1.35                                       | 0.9618                         |
| <i>Anaeroplasmataceae</i>               | 0.0197%             | 0.0000%             | -105.24                                           | 0.1283                               | 0.0131%            | 0.0000%            | -184.54                                    | 0.3017                         |
| uncultured rumen<br>bacterium-01        | 0.0156%             | 0.0007%             | -8.17                                             | 0.3131                               | 0.0254%            | 0.0443%            | 1.52                                       | 0.9500                         |
| <i>Rhodobacteraceae</i>                 | 0.0152%             | 0.0002%             | -25.96                                            | 0.0994                               | 0.0336%            | 0.0217%            | -2.48                                      | 0.8295                         |
| <i>DeFluviitaleaceae</i>                | 0.0116%             | 0.0768%             | 10.05                                             | 0.0026                               | 0.0171%            | 0.0122%            | -1.70                                      | 0.8455                         |
| uncultured rumen<br>bacterium-02        | 0.0114%             | 0.0756%             | 3.66                                              | 0.4847                               | 0.0417%            | 0.0160%            | -4.53                                      | 0.8288                         |
| <i>Xanthomonadaceae</i>                 | 0.0108%             | 0.0000%             | -56.55                                            | 0.2158                               | 0.0277%            | 0.0135%            | -3.45                                      | 0.8295                         |

|                              |         |         |        |        |         |         |       |        |
|------------------------------|---------|---------|--------|--------|---------|---------|-------|--------|
| <i>Caldicoprobacteraceae</i> | 0.0081% | 0.0012% | -3.58  | 0.5132 | 0.0279% | 0.0166% | -2.04 | 0.8295 |
| <i>Beijerinckiaceae</i>      | 0.0064% | 0.0000% | -31.19 | 0.3131 | 0.0146% | 0.0088% | -2.63 | 0.8295 |
| <i>Halomonadaceae</i>        | 0.0060% | 0.0000% | -32.44 | 0.3131 | 0.0144% | 0.0085% | -2.50 | 0.8295 |
| <i>Rubritaleaceae</i>        | 0.0058% | 0.0000% | -32.37 | 0.3131 | 0.0102% | 0.0072% | -1.97 | 0.8575 |
| uncultured                   | 0.0054% | 0.0278% | 8.47   | 0.0727 | 0.0073% | 0.0034% | -2.43 | 0.8295 |
| <i>Lachnospiraceae</i>       |         |         |        |        |         |         |       |        |
| bacterium                    |         |         |        |        |         |         |       |        |
| <i>Sporolactobacillaceae</i> | 0.0037% | 0.0000% | -22.48 | 0.3980 | 0.0106% | 0.0075% | -2.15 | 0.8455 |
| <i>Fusobacteriaceae</i>      | 0.0031% | 0.1846% | 55.28  | 0.0000 | 0.0031% | 0.0023% | -1.99 | 0.8455 |

**Table S3c.** Differential Abundance (%) Analysis of the genus with significant abundance changes (FDR p>0.05) detected in groups G4 and G5 at week 18 and PF.

| Genus                                              | G4 18w<br>Abundance | G5 18w<br>Abundance | G5 18w vs G4<br>18w -<br>Abundance<br>Fold Change | G5 18w vs G4<br>18w - FDR<br>p-value | G4 PF<br>Abundance | G5 PF<br>Abundance | G5 PF vs G4 PF<br>Abundance<br>Fold change | G5 PFvs G4 PF<br>F-FDR p-value |
|----------------------------------------------------|---------------------|---------------------|---------------------------------------------------|--------------------------------------|--------------------|--------------------|--------------------------------------------|--------------------------------|
| [ <i>Eubacterium</i> ]<br><i>fissicatena</i> group | 0.0000%             | 0.1726%             | 3281.08                                           | 0.0000                               | 0.0000%            | 0.0000%            | -1.06                                      | 0.9944                         |
| <i>Morganella</i>                                  | 0.0000%             | 0.1370%             | 2660.27                                           | 0.0000                               | 0.0004%            | 0.0005%            | 1.30                                       | 0.9944                         |
| <i>Sutterella</i>                                  | 0.0000%             | 0.0468%             | 880.64                                            | 0.0002                               | 0.0002%            | 0.0003%            | 1.10                                       | 0.9944                         |
| <i>Erysipelatoclostridium</i>                      | 0.0004%             | 0.0490%             | 191.33                                            | 0.0001                               | 0.0002%            | 0.0481%            | 163.59                                     | 0.0031                         |
| <i>Parasutterella</i>                              | 0.0077%             | 0.2892%             | 80.26                                             | 0.0000                               | 0.0131%            | 0.0122%            | 1.05                                       | 0.9944                         |
| <i>Ruminococcus</i> 2                              | 0.1351%             | 5.3202%             | 52.32                                             | 0.0019                               | 0.0150%            | 0.0080%            | -1.78                                      | 0.9944                         |
| <i>Azospirillum</i> sp.<br>47_25                   | 0.0100%             | 0.1915%             | 50.61                                             | 0.0001                               | 0.0063%            | 0.0660%            | 12.58                                      | 0.1006                         |
| <i>Escherichia-Shigella</i>                        | 0.0252%             | 0.3759%             | 40.22                                             | 0.0021                               | 0.0098%            | 0.0456%            | 4.97                                       | 0.9944                         |
| <i>Eubacterium</i>                                 | 0.0002%             | 0.0089%             | 34.73                                             | 0.0165                               | 0.0002%            | 0.0021%            | 7.48                                       | 0.9944                         |
| <i>Proteus</i>                                     | 0.0002%             | 0.0050%             | 34.45                                             | 0.0181                               | 0.0000%            | 0.0023%            | 22.05                                      | 0.7717                         |
| <i>Fusobacterium</i>                               | 0.0031%             | 0.1846%             | 33.68                                             | 0.0000                               | 0.0031%            | 0.0023%            | -1.37                                      | 0.9944                         |
| ASF356                                             | 0.0008%             | 0.0211%             | 32.91                                             | 0.0019                               | 0.0008%            | 0.0008%            | -1.16                                      | 0.9944                         |
| <i>Bacteroides</i>                                 | 0.5571%             | 10.7110%            | 29.50                                             | 0.0000                               | 0.3675%            | 4.4214%            | 14.04                                      | 0.0000                         |
| <i>Bilophila</i>                                   | 0.0225%             | 0.2011%             | 21.09                                             | 0.0004                               | 0.0138%            | 0.0764%            | 6.87                                       | 0.1764                         |
| CAG-352                                            | 0.0222%             | 0.6521%             | 20.59                                             | 0.0483                               | 0.0169%            | 0.4406%            | 26.18                                      | 0.0923                         |
| gut metagenome-03                                  | 0.1607%             | 1.3943%             | 18.80                                             | 0.0000                               | 0.0373%            | 0.2203%            | 6.55                                       | 0.0825                         |
| <i>Marvinbryantia</i>                              | 0.0027%             | 0.0557%             | 15.80                                             | 0.0052                               | 0.0036%            | 0.0463%            | 14.42                                      | 0.0416                         |
| <i>Blautia</i>                                     | 0.0343%             | 0.3615%             | 14.95                                             | 0.0001                               | 0.0336%            | 0.0378%            | 1.38                                       | 0.9944                         |
| <i>Parabacteroides</i>                             | 0.8872%             | 6.5018%             | 13.94                                             | 0.0000                               | 0.8427%            | 2.6402%            | 3.31                                       | 0.2974                         |
| [ <i>Eubacterium</i> ]<br><i>nodatum</i> group     | 0.0037%             | 0.0665%             | 12.96                                             | 0.0039                               | 0.0029%            | 0.0101%            | 3.68                                       | 0.9929                         |
| <i>Akkermansia</i>                                 | 0.5407%             | 2.5720%             | 12.08                                             | 0.0088                               | 1.2987%            | 0.9640%            | -1.73                                      | 0.9944                         |
| <i>DeFluviitaleaceae</i><br>UCG-011                | 0.0116%             | 0.0768%             | 6.99                                              | 0.0411                               | 0.0171%            | 0.0122%            | -1.43                                      | 0.9944                         |
| <i>Ruminiclostridium</i> 6                         | 2.8602%             | 0.6742%             | -3.85                                             | 0.0286                               | 2.9644%            | 1.6275%            | -1.76                                      | 0.9944                         |
| <i>Ruminococcaceae</i><br>UCG-014                  | 5.4716%             | 0.8043%             | -4.13                                             | 0.0420                               | 8.7869%            | 6.0254%            | -1.70                                      | 0.9944                         |
| uncultured<br>bacterium-21                         | 0.5617%             | 0.0826%             | -4.78                                             | 0.0361                               | 0.2299%            | 0.3953%            | 1.45                                       | 0.9944                         |
| <i>Ruminococcaceae</i><br>NK4A214 group            | 0.3944%             | 0.0706%             | -5.16                                             | 0.0035                               | 0.2342%            | 0.1662%            | -1.61                                      | 0.9944                         |
| <i>Mucispirillum</i>                               | 0.2222%             | 0.0240%             | -5.70                                             | 0.0482                               | 0.2322%            | 0.1784%            | -1.36                                      | 0.9944                         |
| <i>Lachnospiraceae</i><br>UCG-008                  | 0.0570%             | 0.0089%             | -6.94                                             | 0.0040                               | 0.0330%            | 0.0150%            | -2.30                                      | 0.9944                         |
| <i>Peptococcus</i>                                 | 0.0347%             | 0.0041%             | -7.09                                             | 0.0031                               | 0.0142%            | 0.0181%            | 1.14                                       | 0.9944                         |
| <i>Anaerovorax</i>                                 | 0.0148%             | 0.0014%             | -7.47                                             | 0.0132                               | 0.0204%            | 0.0357%            | 1.54                                       | 0.9944                         |
| <i>Lachnospiraceae</i><br>UCG-006                  | 0.3179%             | 0.0322%             | -8.33                                             | 0.0001                               | 0.3244%            | 0.1926%            | -1.54                                      | 0.9944                         |
| <i>Lachnospiraceae</i><br>UCG-002                  | 0.1118%             | 0.0106%             | -10.82                                            | 0.0053                               | 0.1275%            | 0.0567%            | -2.08                                      | 0.9944                         |

|                                                    |         |         |        |        |         |         |        |        |
|----------------------------------------------------|---------|---------|--------|--------|---------|---------|--------|--------|
| A2                                                 | 0.0189% | 0.0022% | -12.36 | 0.0198 | 0.0250% | 0.0016% | -15.69 | 0.0598 |
| <i>Rikenellaceae</i> RC9 gut group                 | 0.0493% | 0.0024% | -13.19 | 0.0005 | 0.0751% | 0.0137% | -5.89  | 0.0598 |
| unidentified                                       | 0.0355% | 0.0014% | -13.22 | 0.0032 | 0.0204% | 0.0303% | 1.13   | 0.9944 |
| [ <i>Ruminococcus</i> ]<br><i>torques</i> group    | 0.0131% | 0.0007% | -13.68 | 0.0377 | 0.0192% | 0.0057% | -3.77  | 0.9944 |
| [ <i>Eubacterium</i> ]<br><i>ruminantium</i> group | 4.1690% | 0.2417% | -16.38 | 0.0128 | 4.7466% | 1.9847% | -2.39  | 0.9944 |
| <i>Odoribacter</i>                                 | 0.5303% | 0.0101% | -20.96 | 0.0152 | 0.4259% | 0.0753% | -5.03  | 0.9944 |
| <i>Oscillospira</i>                                | 0.0066% | 0.0002% | -23.81 | 0.0232 | 0.0038% | 0.0044% | 1.06   | 0.9944 |
| <i>Moryella</i>                                    | 0.0073% | 0.0002% | -25.49 | 0.0454 | 0.0069% | 0.0016% | -3.80  | 0.9944 |
| <i>Lachnospiraceae</i><br>UCG-004                  | 0.4825% | 0.0048% | -57.92 | 0.0163 | 0.1706% | 0.0062% | -34.84 | 0.1344 |
