# Supplementary material for: Effect of Clindamycin on Intestinal Microbiome and Miltefosine Pharmacology in Hamsters Infected with Leishmania infantum
Source: Antibiotics (Basel). 2023 Feb 9;12(2):362. doi: 10.3390/antibiotics12020362 (PMC9952363; doi:10.3390/antibiotics12020362)
Supplement: Supplementary file 1 [file antibiotics-12-00362-s001.zip]

Archive with 4 entries (4 files):
- 1.SUPPLEMENTARY MATERIAL 1 FIGURE S1.pdf
- 2.SUPPLEMENTARY MATERIAL 2 Tables S1a, S1b and S1c (rev).pdf
- 3. SUPPLEMENTARY MATERIAL 3 Tables S2a, S2b and S2c (rev).pdf
- 4. SUPPLEMENTARY INFORMATION 4 Tables S3a, S3b and S3c (rev).pdf
